# Supplementary material
Source: PubMed Central journal article supplement (PMC3885642)
Supplement: cc-12-3317-s01.pdf [file cc-12-3317-s01.pdf]

## **Supplemental Material to:**

**Véronique Tuloup-Minguez, Ahmed Hamai, Anne Greffard,  
Valérie Nicolas, Patrice Codogno, and Joëlle Botti\***

**Autophagy modulates cell migration and  $\beta$ 1-integrin  
membrane recycling**

**Cell Cycle 2013; 12(20)**

**<http://dx.doi.org/10.4161/cc.26298>**

**<http://www.landesbioscience.com/journals/cc/article/26298>**

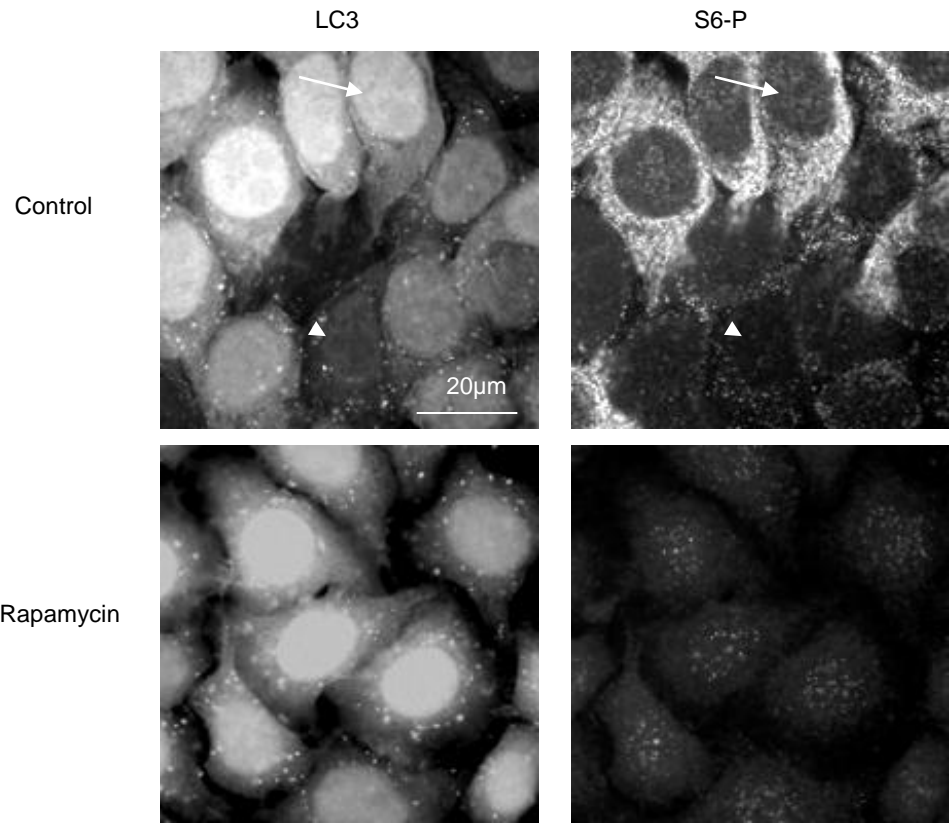

Figure S1

**A**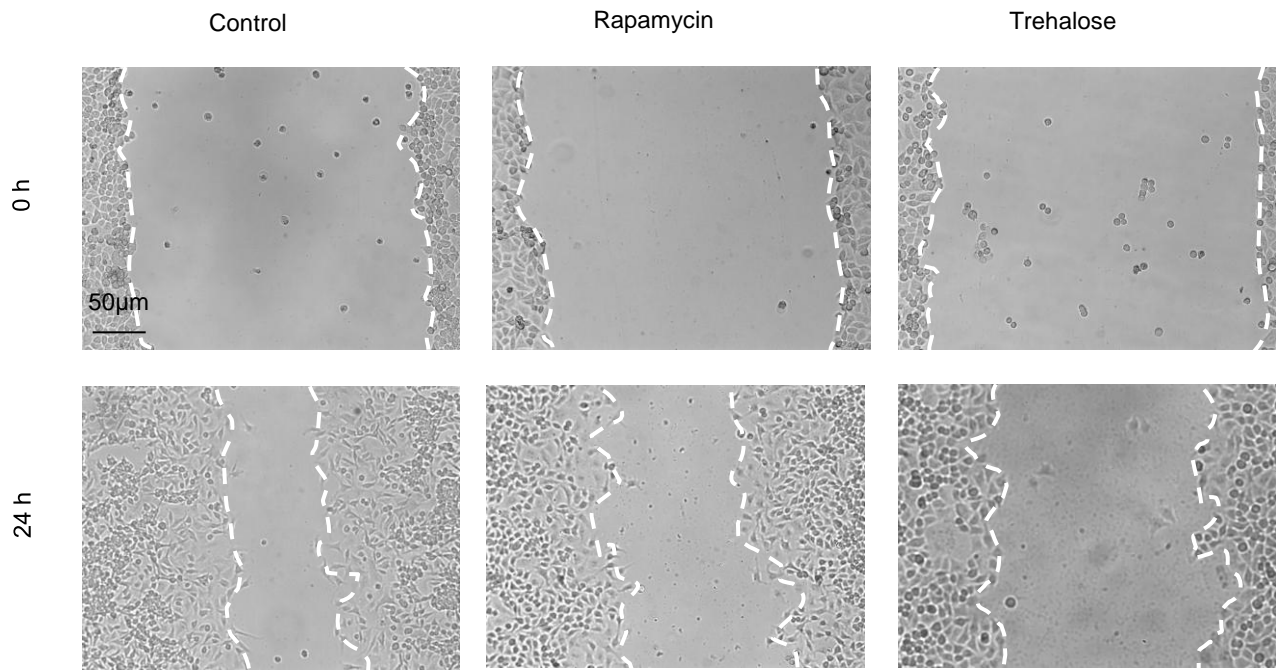**B**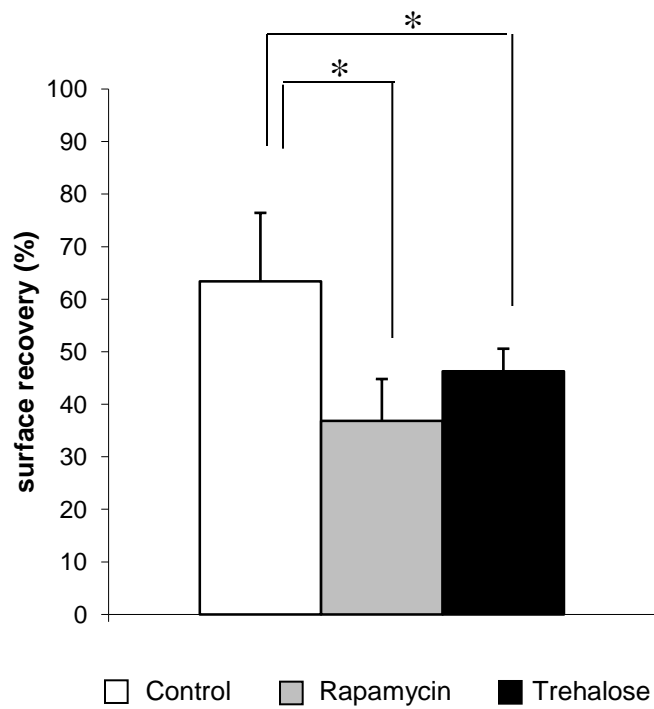

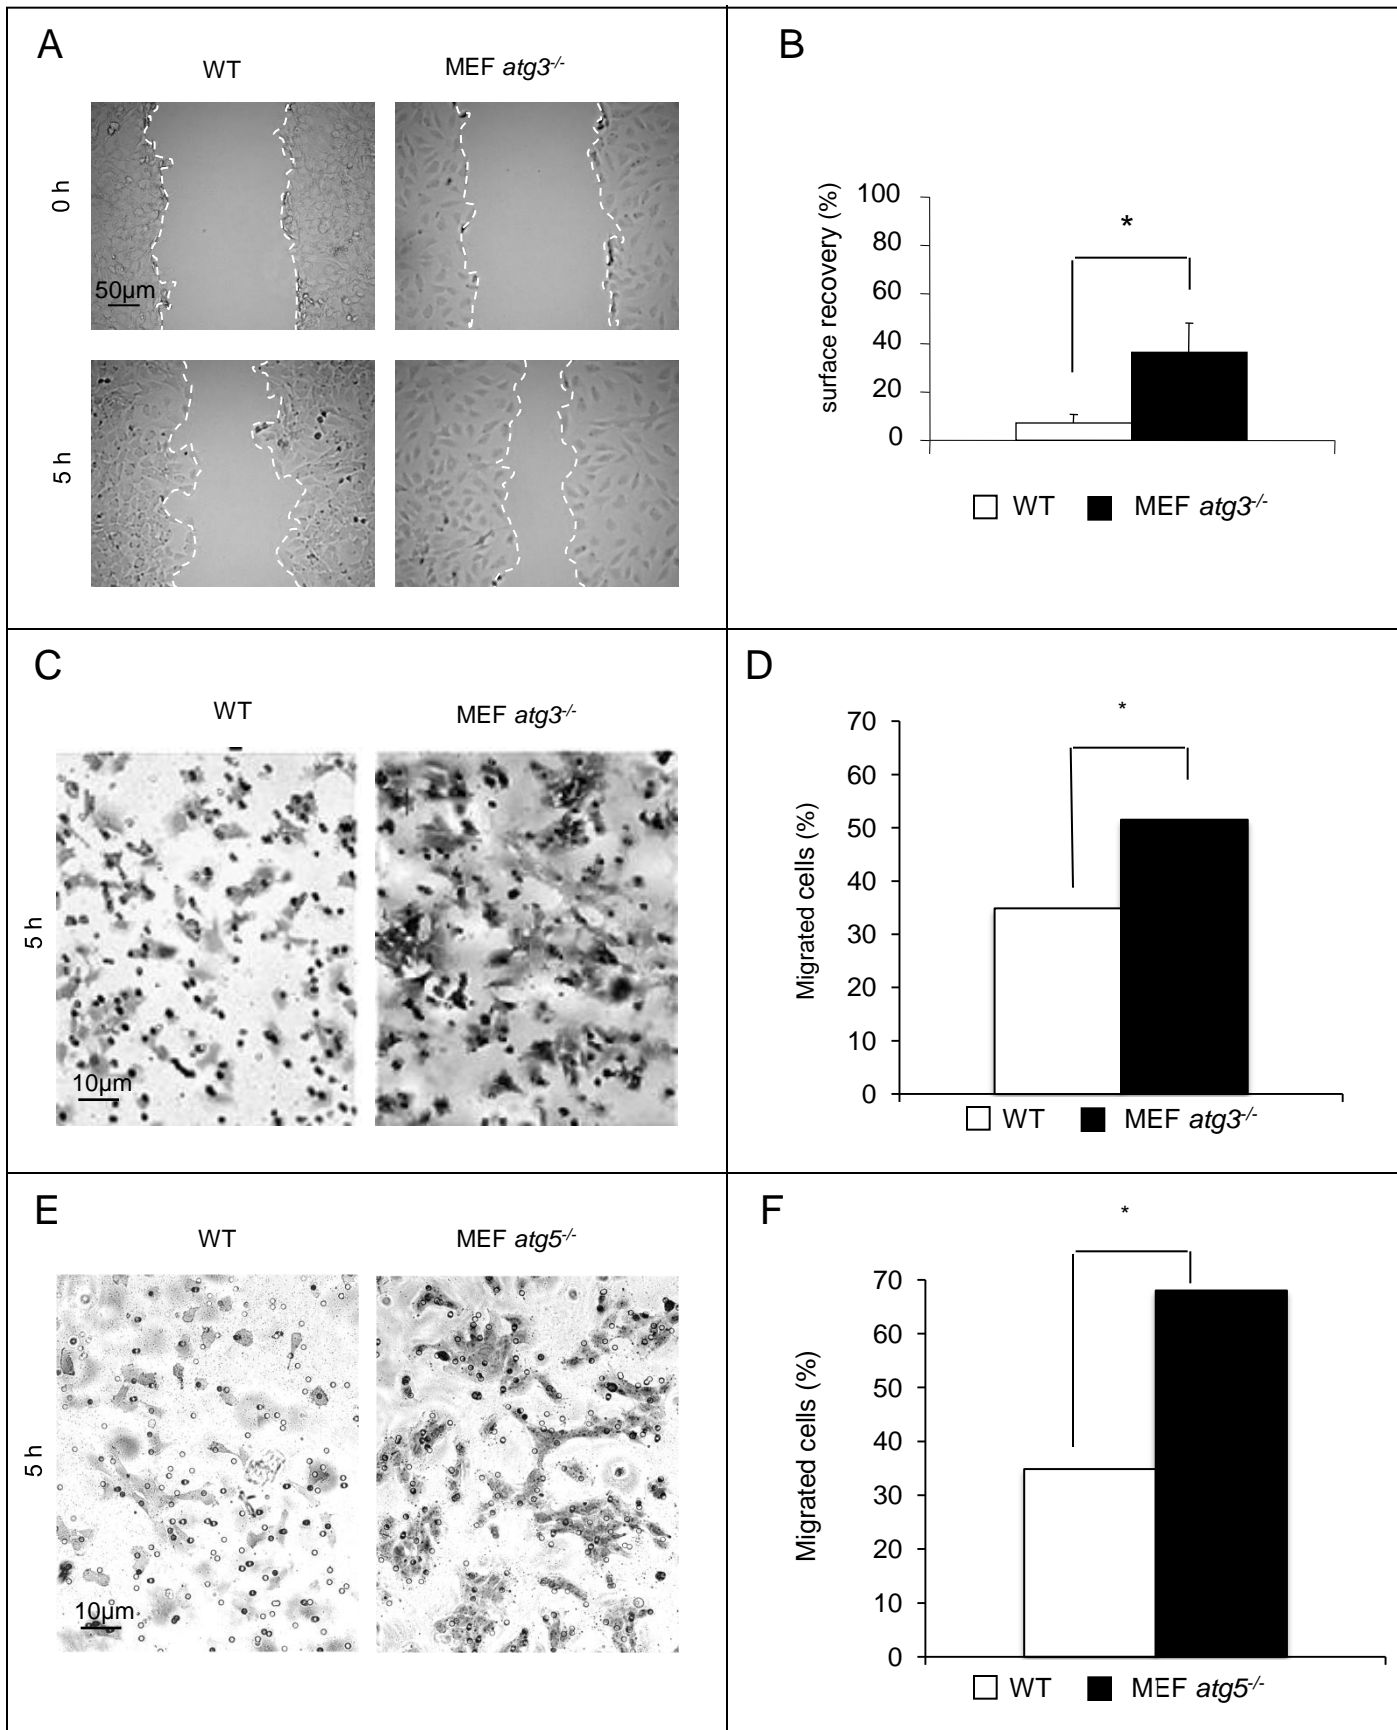

Figure S3

**A**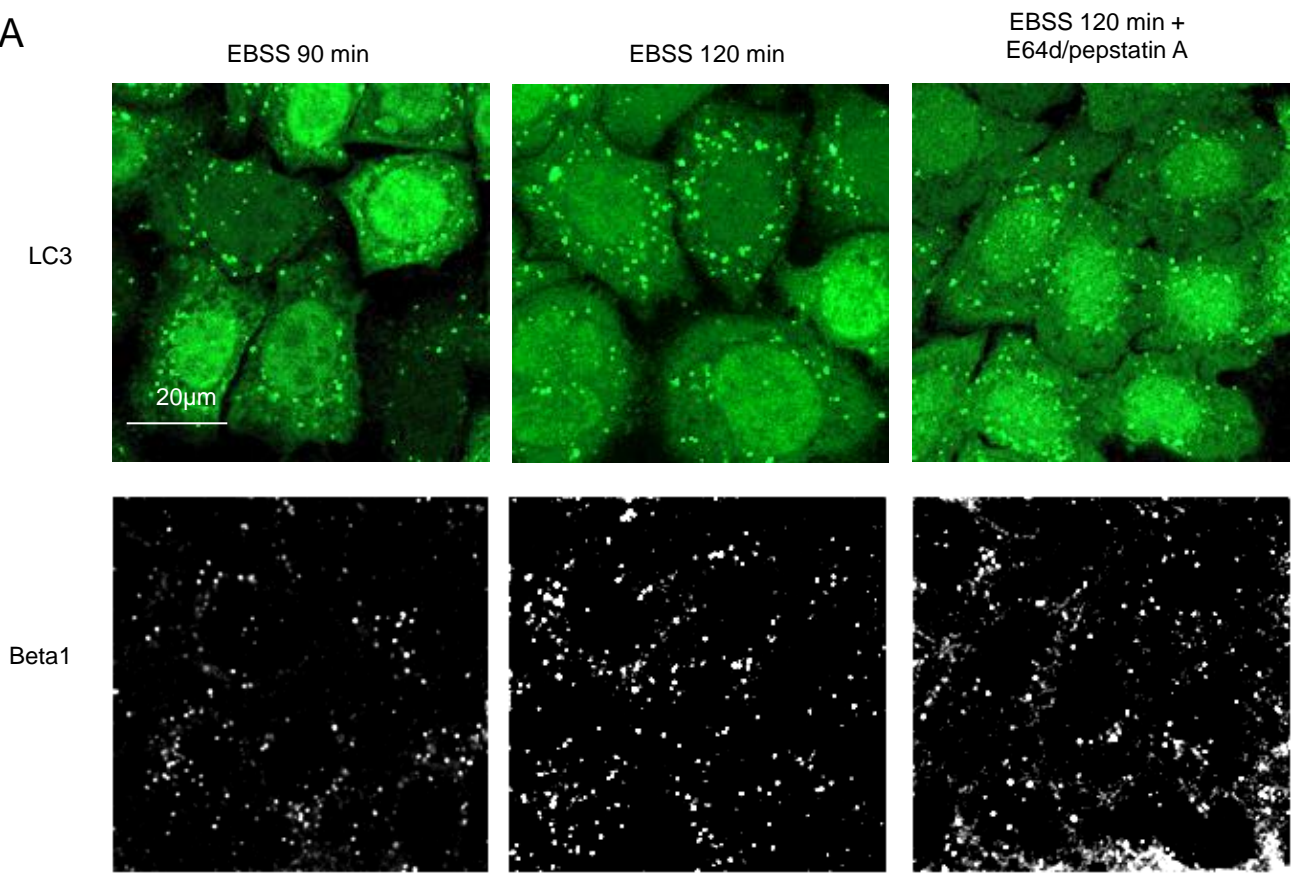**B**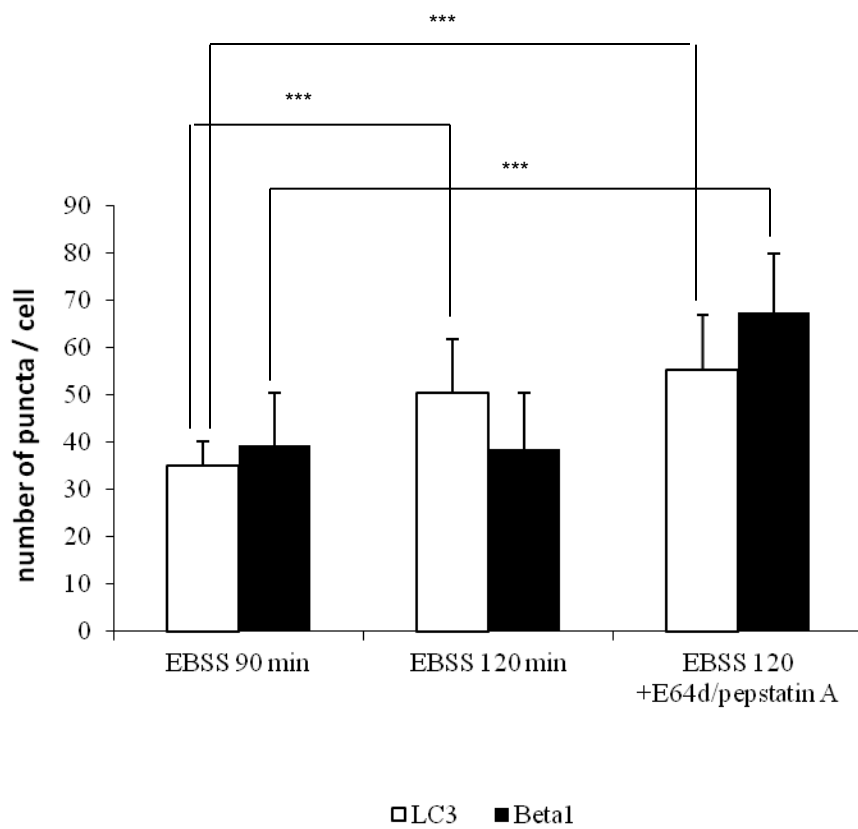

Figure S4

## Supplemental material

**Figure S1: Activation of MTOR is correlated to autophagy inhibition in confluent HeLa cells.** HeLa-GFP-LC3 cells were grown to confluence in complete medium (Control) or medium containing 200 nM rapamycin (Rapamycin). The cells were fixed with 4% paraformaldehyde, and then stained with anti-S6-P antibody (1:100). The arrow indicates a low level of GFP-LC3 puncta correlated with high phosphorylation of S6. The arrowhead indicates a high level of GFP-LC3 puncta correlated with low phosphorylation of S6.

**Figure S2: Effect of rapamycin and trehalose on the migration of HeLa cells. A.** Cell monolayers were assayed for wound-healing migration in complete medium, medium containing 200 nM rapamycin and medium containing 10- $\mu$ M trehalose. Phase-contrast microscopy was carried out to record the relative rate of wound closure immediately after the scratch (0 h) and after 24 h of migration (24 h). **B.** The surface of the wound was evaluated by Image J software, and the percentage of the surface to have recovered was determined. Results are representative of four independent experiments  $\pm$  SD. \* $p < 0.05$ .

**Figure S3: Effect of Atg3 and Atg5 knock out on MEF migration. A.** Control MEF (WT) and *atg3*<sup>-/-</sup> MEF (MEF *atg3*<sup>-/-</sup>) monolayers were assayed for wound-healing migration in complete medium. Phase-contrast microscopy was carried out to record the relative rate of wound closure after the scratch (0 h) and after 5 h of migration (5 h). **B.** The surface of the wound was evaluated by Image J software, and the percentage of the

surface to have recovered was determined. Results are representative of four independent experiments  $\pm$  SD. \* $p < 0.05$ . **C** and **E**. Control MEFs (WT), *atg3*<sup>-/-</sup> MEFs (MEF *atg3*<sup>-/-</sup>) and *atg5*<sup>-/-</sup> MEFs (MEF *atg5*<sup>-/-</sup>) were plated at the top of a Transwell, and allowed to migrate for 5 h. They were then rinsed, fixed with 4% paraformaldehyde, stained with crystal violet, and counted. Images show cells on the undersurface of a filter. **D** and **F**. The percentage of migrated cells was evaluated using the migration after 24 h as equivalent to 100% migration. Results are representative of four independent experiments  $\pm$  SD. \* $p < 0.05$

**Figure S4: Quantification of autophagosomes and  $\beta$ 1 integrins during starvation.**

**A.** HeLa-GFP-LC3 cells were first incubated in starvation medium for 4 h. The cells were then stained with anti- $\beta$ 1 integrin antibody (P5D2 1:50) before either being treated with the lysosomal inhibitors E64d (10 $\mu$ M) and pepstatin A (10 $\mu$ g/ml) or not treated. After 90 or 120 min of endocytosis, the cells were fixed with 4% paraformaldehyde, and the autophagosomes and  $\beta$ 1 integrins were observed by fluorescence microscopy. **B.** The graph indicates the number of autophagosomes per cell and the number of  $\beta$ 1-stained puncta per cell. Results are representative of three independent experiments  $\pm$  SD \* $p < 0.05$ , \*\* $p < 0.01$ , \*\*\* $p < 0.005$ .

**Videos 1 and 2: Convergence of the  $\beta$ 1 integrin endocytic pathway and the autophagic pathway in migrating cells.** HeLa-GFP-LC3 were wounded with a p200 pipet tip, and then incubated with an anti- $\beta$ 1 integrin monoclonal antibody (P5D2 1:100 and Alexa-Fluor 594 anti-IgG antibody) for 4 h at 37°C. **A.** Cells in complete medium:

control (video 1) or **B**. Cells treated with rapamycin 200 nM for 4 h: rapamycin (video 2) . After the incubation, the coverslips were placed in a temperature- and CO<sub>2</sub>-controlled incubator chamber mounted on the microscope stage, and examined using time-lapse fluorescent microscopy. A total of approximately 200 images were obtained; each had a timelapse of 1.2 sec, and was taken with the green and red filters sets.

**Videos 3 and 4: Redistribution of  $\beta$ 1 integrins on the adhesion sites at the plasma membrane.** HeLa-GFP-LC3 were incubated with anti- $\beta$ 1 integrin antibody (P5D2 1:50) and Alexa fluor 555 anti-IgG antibody (1:2000) for 30 min at 4°C, then washed and incubated in complete medium (video 3) or in EBSS (video 4) under the videomicroscope at 37°C . For TIRF microscopy-videos, frames were acquired every 3 minutes for two hours under physiological conditions, i.e. 5% CO<sub>2</sub> and 37°C. The focus was maintained by the Definite focus device.
